# Supplementary material for: Epidemiological Interface of Sylvatic and Dog Rabies in the North West Province of South Africa
Source: MDPI journal article supplement (doi:10.3390/tropicalmed7060090), 2022-06-05
Supplement: s1 [file s1]

**Table S1:** List of RABV sequences included in the phylogenetic analysis for both the partial N gene and G-L intergenic region.

| <b>Year Sampled</b> | <b>Sample Number</b> | <b>Species</b>   | <b>Country</b> | <b>Province</b>  | <b>Latitude</b> | <b>Longitude</b> | <b>Accession number (partial N gene)</b> | <b>Accession number (G-L gene region)</b> |
|---------------------|----------------------|------------------|----------------|------------------|-----------------|------------------|------------------------------------------|-------------------------------------------|
| 1989                | 399                  | Jackal           | Botswana       | Tsabong          | -25.754         | 22.41838         | AY330747                                 | --                                        |
| 1990                | 420/90               | Yellow mongoose  | South Africa   | North West       | -27.1974        | 25.98311         | FJ392383                                 | AF079921                                  |
| 1990                | m466                 | Yellow mongoose  | South Africa   | Free State       | -27.374         | 26.61996         | --                                       | AF079922                                  |
| 1991                | 19671                | African civet    | Zimbabwe       | Manicaland       | -18.5279        | 32.12843         | KY553266                                 | AF304188                                  |
| 1994                | 22574                | African civet    | Zimbabwe       | Mashonaland East | -18.6173        | 31.5736          | KY553255                                 | AF304183                                  |
| 2003                | KZNdg03.453          | Canine           | South Africa   | KwaZulu-Natal    | -29.8579        | 31.0292          | --                                       | DQ841514                                  |
| 2006                | 696/06               | Yellow mongoose  | South Africa   | Free State       | -27.6504        | 27.23488         | JQ692994                                 | --                                        |
| 2008                | UPV128               | Canine           | South Africa   | KwaZulu-Natal    | -29.8579        | 31.0292          | JF747613                                 | --                                        |
| 2011                | 11_185               | Canine           | South Africa   | KwaZulu-Natal    | -29.5093        | 30.19838         | KJ744305                                 | --                                        |
| 2012                | 556/12               | Canine           | South Africa   | North West       | -25.2775        | 27.21605         | KT892003                                 | MK103308                                  |
| 2014                | 889/14               | African wild dog | South Africa   | North West       | -24.7435        | 26.25732         | KT891999                                 | --                                        |
| 2015                | 471/15               | Canine           | South Africa   | North West       | -27.2371        | 26.23514         | MT454634                                 | MT454634                                  |
| 2015                | 682/15               | Canine           | South Africa   | North West       | -24.7435        | 26.25732         | MT454635                                 | MT454635                                  |
| 2015                | KZNbov15/261         | Bovine           | South Africa   | KwaZulu-Natal    | -29.4893        | 30.21665         | --                                       | KY681395                                  |

|      |                    |         |              |            |          |          |          |          |
|------|--------------------|---------|--------------|------------|----------|----------|----------|----------|
| 2016 | 516/16             | Canine  | South Africa | North West | -25.4261 | 27.2243  | MT454636 | MT454636 |
| 2016 | 635/16             | Canine  | South Africa | North West | -25.8026 | 27.87506 | MT454639 | MT454639 |
| 2017 | <b>NWdog17/17</b>  | Canine  | South Africa | North West | -25.7905 | 27.2421  | MW344002 | MW343892 |
| 2017 | <b>NWbov22/17</b>  | Bovine  | South Africa | North West | -26.9566 | 24.7284  | MW344003 | MW343893 |
| 2017 | <b>NWdog31/17</b>  | Canine  | South Africa | North West | -25.1609 | 27.16296 | MW344014 | MW343904 |
| 2017 | <b>NWbov57/17</b>  | Bovine  | South Africa | North West | -26.9566 | 24.7284  | MW344005 | MW343895 |
| 2017 | <b>NWbov59/17</b>  | Bovine  | South Africa | North West | -27.1887 | 25.32931 | MW344007 | MW343897 |
| 2017 | <b>NWbov62/17</b>  | Bovine  | South Africa | North West | -26.8648 | 24.79046 | MW344015 | MW343905 |
| 2017 | <b>NWbov74/17</b>  | Bovine  | South Africa | North West | -26.9566 | 24.7284  | MW344011 | MW343901 |
| 2017 | <b>NWbov126/17</b> | Bovine  | South Africa | North West | -26.9566 | 24.7284  | MW344016 | MW343906 |
| 2017 | <b>NWjac198/17</b> | Jackal  | South Africa | North West | -26.6864 | 25.45907 | MW344017 | MW343907 |
| 2017 | <b>NWbov331/17</b> | Bovine  | South Africa | North West | -27.1887 | 25.32931 | MW344018 | MW343908 |
| 2017 | <b>NWbov432/17</b> | Bovine  | South Africa | North West | -26.1739 | 26.46947 | MW343988 | MW343878 |
| 2017 | <b>NWbov435/17</b> | Bovine  | South Africa | North West | -26.9566 | 24.7284  | MW344004 | MW343894 |
| 2017 | <b>NWcap528/17</b> | Caprine | South Africa | North West | -27.5311 | 24.78659 | MW343987 | MW343877 |
| 2017 | <b>NWovi583/17</b> | Ovine   | South Africa | North West | -27.5311 | 24.78659 | MW344006 | MW343896 |
| 2017 | <b>NWbov604/17</b> | Bovine  | South Africa | North West | -26.9566 | 24.7284  | MW343989 | MW343879 |

|             |                    |                     |              |            |          |          |          |          |
|-------------|--------------------|---------------------|--------------|------------|----------|----------|----------|----------|
| <b>2017</b> | <b>NWcap608/17</b> | Caprine             | South Africa | North West | -25.1334 | 26.86546 | MW344008 | MW343898 |
| <b>2017</b> | <b>NWbov630/17</b> | Bovine              | South Africa | North West | -26.125  | 23.7725  | MW344009 | MW343899 |
| <b>2017</b> | <b>NWbbj666/17</b> | Black-backed jackal | South Africa | North West | -26.2802 | 25.10966 | MW344010 | MW343900 |
| <b>2017</b> | <b>GPdog574/17</b> | Canine              | South Africa | Gauteng    | -25.4729 | 28.09919 | MW344012 | MW343902 |
| <b>2017</b> | 269/17             | Canine              | South Africa | North West | -26.9566 | 24.7284  | MT454643 | MT454643 |
| <b>2017</b> | 400/17             | Canine              | South Africa | North West | -26.9566 | 24.7284  | MT454645 | MT454645 |
| <b>2017</b> | 454/17             | Black-backed jackal | South Africa | North West | -26.7167 | 27.1     | MT454646 | MT454646 |
| <b>2017</b> | 460/17             | Black-backed jackal | South Africa | North West | -26.5961 | 24.17612 | MT454647 | MT454647 |
| <b>2017</b> | 474/17             | Black-backed jackal | South Africa | North West | -27.5311 | 24.78659 | MT454649 | MT454649 |
| <b>2017</b> | 477/17             | Bat-eared fox       | South Africa | North West | -26.6181 | 25.65319 | MT454650 | MT454650 |
| <b>2017</b> | 480/17             | Black-backed jackal | South Africa | North West | -27.1887 | 25.32931 | MT454651 | MT454651 |
| <b>2017</b> | 466/17             | Black-backed jackal | South Africa | North West | -26.7167 | 27.1     | MT454648 | MT454648 |
| <b>2017</b> | 483/17             | Black-backed jackal | South Africa | North West | -26.3138 | 26.89865 | MT454652 | MT454652 |
| <b>2017</b> | 502/17             | Black-backed jackal | South Africa | North West | -26.7167 | 27.1     | MT454653 | MT454653 |

|             |                    |                     |              |            |          |          |          |          |
|-------------|--------------------|---------------------|--------------|------------|----------|----------|----------|----------|
| <b>2017</b> | 503/17             | Black-backed jackal | South Africa | North West | -26.7167 | 27.1     | MT454654 | MT454654 |
| <b>2017</b> | <b>LPbov354/17</b> | Bovine              | South Africa | Limpopo    | -24.5917 | 27.41155 | MW343945 | MW343835 |
| <b>2018</b> | <b>NWdog44/18</b>  | Canine              | South Africa | North West | -26.152  | 26.15968 | MW343985 | MW343875 |
| <b>2018</b> | <b>NWbbj110/18</b> | Black-backed jackal | South Africa | North West | -27.1718 | 26.12699 | MW343983 | MW343873 |
| <b>2018</b> | <b>NWdog121/18</b> | Canine              | South Africa | North West | -26.4677 | 26.83939 | MW343984 | MW343874 |
| <b>2018</b> | <b>NWbbj135/18</b> | Black-backed jackal | South Africa | North West | -26.9566 | 24.7284  | MW343990 | MW343880 |
| <b>2018</b> | <b>NWbbj195/18</b> | Black-backed jackal | South Africa | North West | -26.2833 | 26.8     | MW343986 | MW343876 |
| <b>2018</b> | <b>NWdog270/18</b> | Canine              | South Africa | North West | -25.354  | 26.53009 | MW344019 | MW343909 |
| <b>2018</b> | <b>NWdog293/18</b> | Canine              | South Africa | North West | -25.1334 | 26.86546 | MW344020 | MW343910 |
| <b>2018</b> | <b>NWbov299/18</b> | Bovine              | South Africa | North West | -27.4377 | 25.13069 | MW343991 | MW343881 |
| <b>2018</b> | <b>NWbbj343/18</b> | Black-backed jackal | South Africa | North West | -27.914  | 25.16111 | MW343981 | MW343871 |
| <b>2018</b> | <b>NWbov382/18</b> | Bovine              | South Africa | North West | -26.152  | 26.15968 | MW343997 | MW343887 |
| <b>2018</b> | <b>NWbbj387/18</b> | Black-backed jackal | South Africa | North West | -26.8097 | 27.28492 | MW343998 | MW343888 |
| <b>2018</b> | <b>NWdog391/18</b> | Canine              | South Africa | North West | -26.8351 | 27.04304 | MW343999 | MW343889 |

|      |              |                     |              |            |          |          |          |          |
|------|--------------|---------------------|--------------|------------|----------|----------|----------|----------|
| 2018 | NWdog405/18  | Canine              | South Africa | North West | -25.8963 | 27.42684 | MW344021 | MW343911 |
| 2018 | NWdog420/18  | Canine              | South Africa | North West | -25.605  | 27.91    | MW344000 | MW343890 |
| 2018 | NWovi429/18  | Ovine               | South Africa | North West | -26.4748 | 27.06278 | MW344001 | MW343891 |
| 2018 | NWjac455/18  | Jackal              | South Africa | North West | -26.152  | 26.15968 | MW343978 | MW343868 |
| 2018 | NWgen516/18  | Genet               | South Africa | North West | -25.537  | 26.07512 | MW344022 | MW343912 |
| 2018 | NWbef103/18  | Bat-eared fox       | South Africa | North West | -26.1944 | 24.92368 | MW344013 | MW343861 |
| 2019 | GPbov309/19  | Bovine              | South Africa | Gauteng    | -26.0858 | 27.77515 | MW343994 | MW343884 |
| 2019 | NWbov76/19   | Bovine              | South Africa | North West | 25.16111 | 24.17612 | MW343969 | MW343859 |
| 2019 | NWbbj96/19   | Black-backed jackal | South Africa | North West | -26.3138 | 26.89865 | MW343970 | MW343860 |
| 2019 | NWcap103/19  | Caprine             | South Africa | North West | -26.8091 | 26.00538 | MW343971 | MW343861 |
| 2019 | NWbov109/19  | Bovine              | South Africa | North West | -26.9566 | 24.7284  | MW343972 | MW343862 |
| 2019 | NWbov151/19  | Bovine              | South Africa | North West | -25.1334 | 26.86546 | MW343982 | MW343872 |
| 2019 | NWdog169/19  | Canine              | South Africa | North West | -26.8091 | 26.00538 | MW343975 | MW343865 |
| 2019 | NWward171/19 | Aardwolf            | South Africa | North West | -25.6676 | 27.24208 | MW343976 | MW343866 |
| 2019 | NWdog191/19  | Canine              | South Africa | North West | -25.6676 | 27.24208 | MW343973 | MW343863 |
| 2019 | NWbbj219/19  | Black-backed jackal | South Africa | North West | -25.6676 | 27.24208 | MW343974 | MW343864 |

|             |                    |                     |              |            |          |          |          |          |
|-------------|--------------------|---------------------|--------------|------------|----------|----------|----------|----------|
| <b>2019</b> | <b>NWbbj248/19</b> | Black-backed jackal | South Africa | North West | -26.8521 | 26.66672 | MW343977 | MW343867 |
| <b>2019</b> | <b>NWjac325/19</b> | Jackal              | South Africa | North West | -25.6676 | 27.24208 | MW343979 | MW343869 |
| <b>2019</b> | <b>NWbov331/19</b> | Bovine              | South Africa | North West | -25.354  | 26.53009 | MW343980 | MW343870 |
| <b>2019</b> | <b>NWbov379/19</b> | Bovine              | South Africa | North West | -26.9333 | 25.41667 | MW343992 | MW343882 |
| <b>2019</b> | <b>NWbov380/19</b> | Bovine              | South Africa | North West | -27.2231 | 25.27706 | MW343995 | MW343885 |
| <b>2019</b> | <b>NWbov428/19</b> | Bovine              | South Africa | North West | -26.2    | 25.9     | MW343996 | MW343886 |

Sample numbers for sequences generated in this study are shown in bold.
